# Supplementary material for: Electronic relaxation pathways of the biologically relevant pterin chromophore
Source: Royal Society of Chemistry journal article supplement (doi:10.1039/c7cp01574g), 2017-01-01
Supplement: c7cp01574g1.pdf [file c7cp01574g1.pdf]

## Electronic Relaxation Pathways of the Biologically Relevant Pterin Chromophore

Regina DiScipio, Raymond Y. Santiago,<sup>†</sup> Daisha Taylor,<sup>‡</sup> Carlos E. Crespo-Hernández\*  
Department of Chemistry, Case Western Reserve University, 10900 Euclid Ave., Cleveland,  
Ohio 44106

\* Corresponding author. E-mail: carlos.crespo@case.edu

<sup>†</sup> Participated as summer undergraduate research assistant. Present address: Department of Chemistry, Ohio State University, Columbus, Ohio.

<sup>‡</sup> Fellow of the ACS SEED Summer Program. Present address: John Hay High School, Cleveland, Ohio.

## Electronic Supplementary Information

### 1. Calculated Ground-State Tautomers Energies

**Table S1.** Predicted ground-state stabilization energies (eV) for the two lowest-energy tautomers of pterin at pH 10.5 (see Scheme 1) in water at the X/IEF-PCM/6-311++G(d,p) level of theory<sup>a</sup>

| <b>X</b>         | <b>1a</b> | <b>1b</b> |
|------------------|-----------|-----------|
| <b>B3LPY</b>     | 0.00      | 0.31      |
| <b>CAM-B3LYP</b> | 0.00      | 0.34      |
| <b>M052x</b>     | 0.00      | 0.36      |
| <b>PBE1PBE</b>   | 0.00      | 0.32      |
| <b>MP2</b>       | 0.00      | 0.41      |

<sup>a</sup> where X stands for the functional.

## 2. Time-Resolved Absorption Spectroscopy

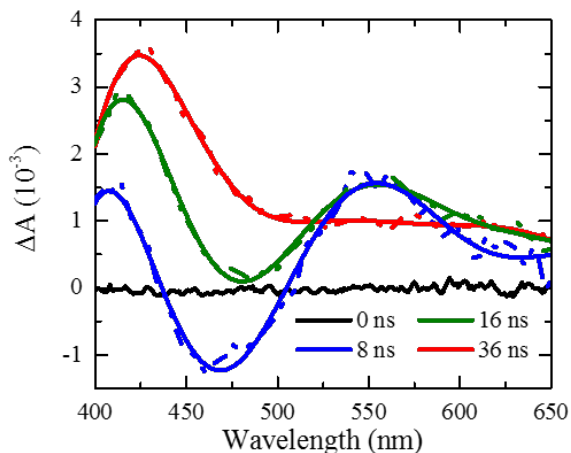

**Figure S1.** Nanosecond transient absorption spectra of **1a** in aqueous borate buffered solution at pH 10.5 under ambient (air) conditions. The experimental data is shown with the dashed lines. Solid curve lines are shown for clarity (i.e., as a guide to the eye).

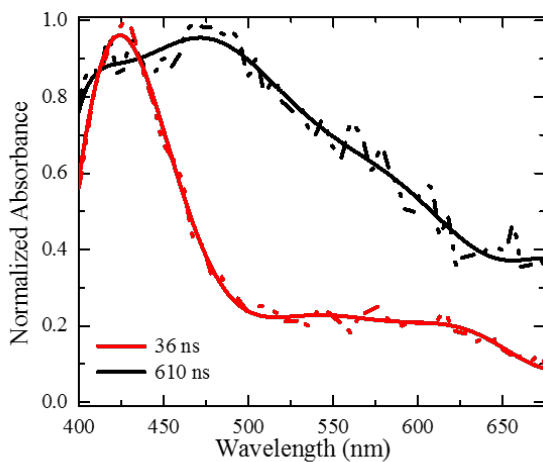

**Figure S2.** Normalized nanosecond transient absorption spectra of the two long-lived species of **1a** in aqueous borate buffered solution at pH 10.5 under ambient (air) conditions. Showing maximum triplet signal (red) and the maximum neutral radical signal (black). The experimental data is shown with the dashed lines. Solid curve lines are shown for clarity (i.e., as a guide to the eye).

### 3. Stern-Volmer Plot

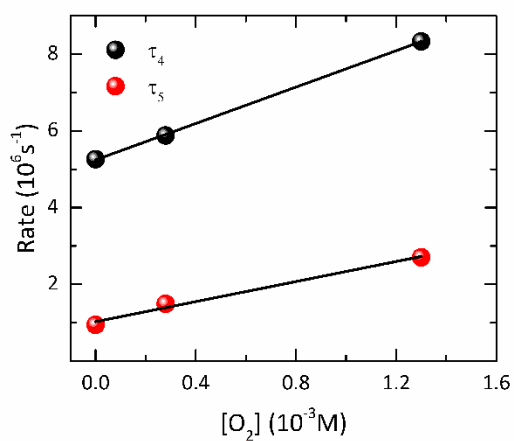

**Figure S3.** Stern-Volmer plots of the decay rate for the two long-lived transient species of **1a** in aqueous buffered solution at pH 10.5 (see Table 2) as a function of oxygen concentration in solution.
